# Supplementary material for: LFA-1 interaction with GBP-130 on Plasmodium falciparum-infected red blood cells mediates NK cell activation and parasite control
Source: eLife journal article supplement (doi:10.7554/elife.110942), 2026-05-28

Figure 2-figure supplement 1B

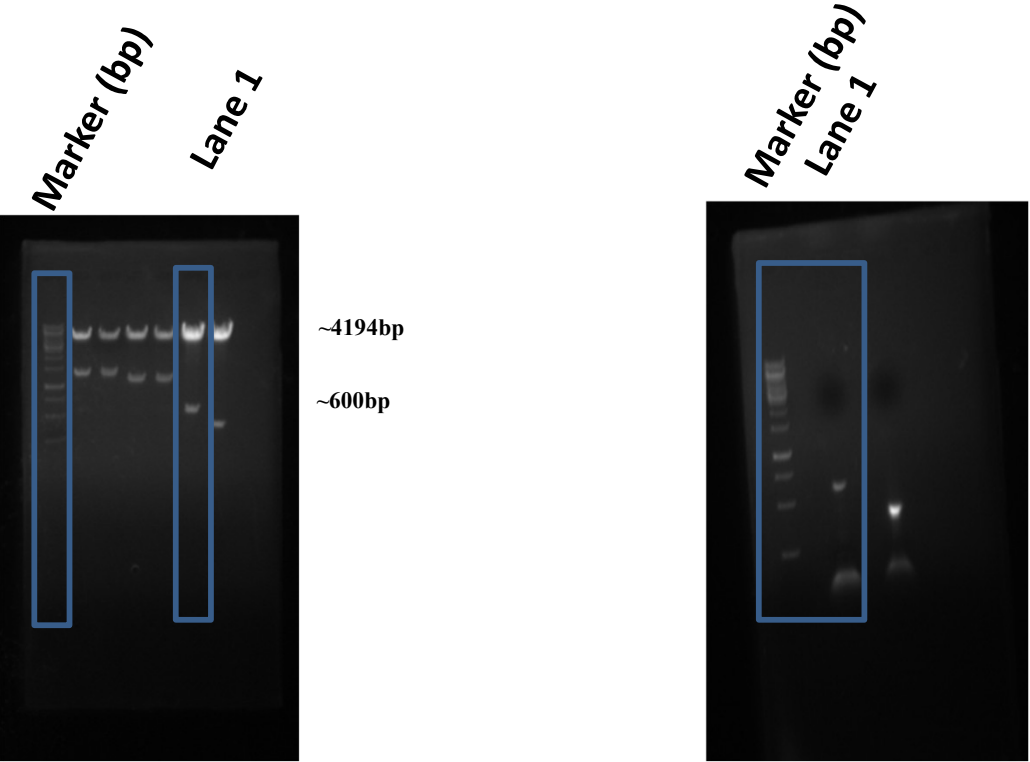

Figure 2-figure supplement 1C\_i

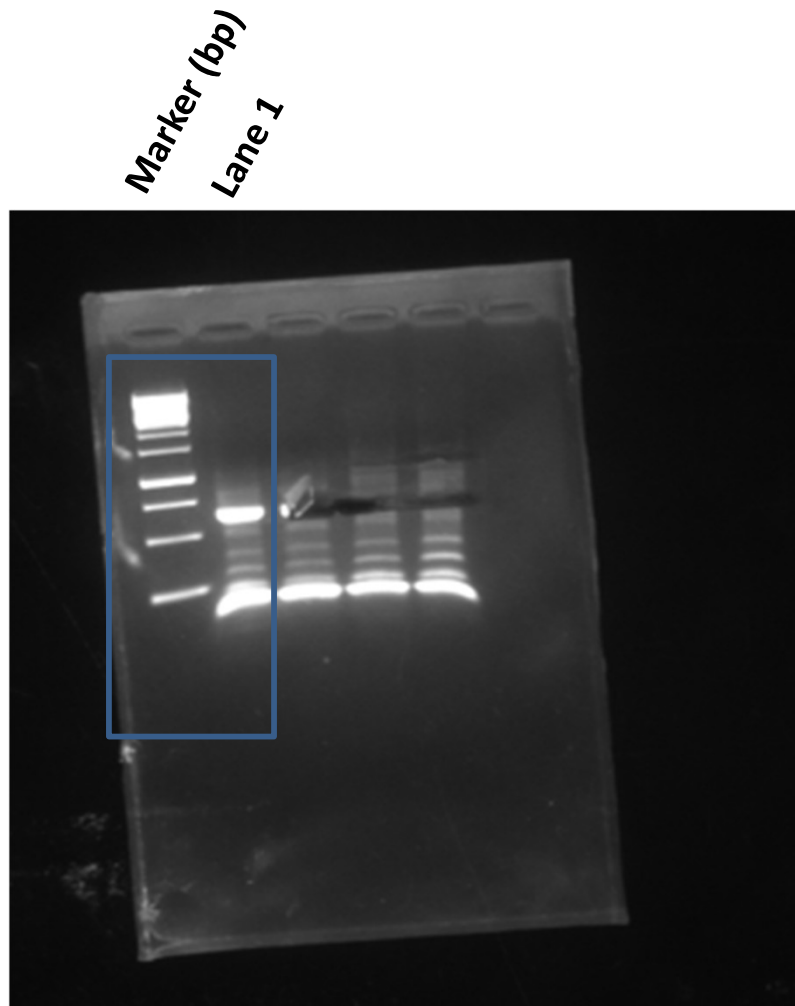

Figure 2-figure supplement 1C\_ii

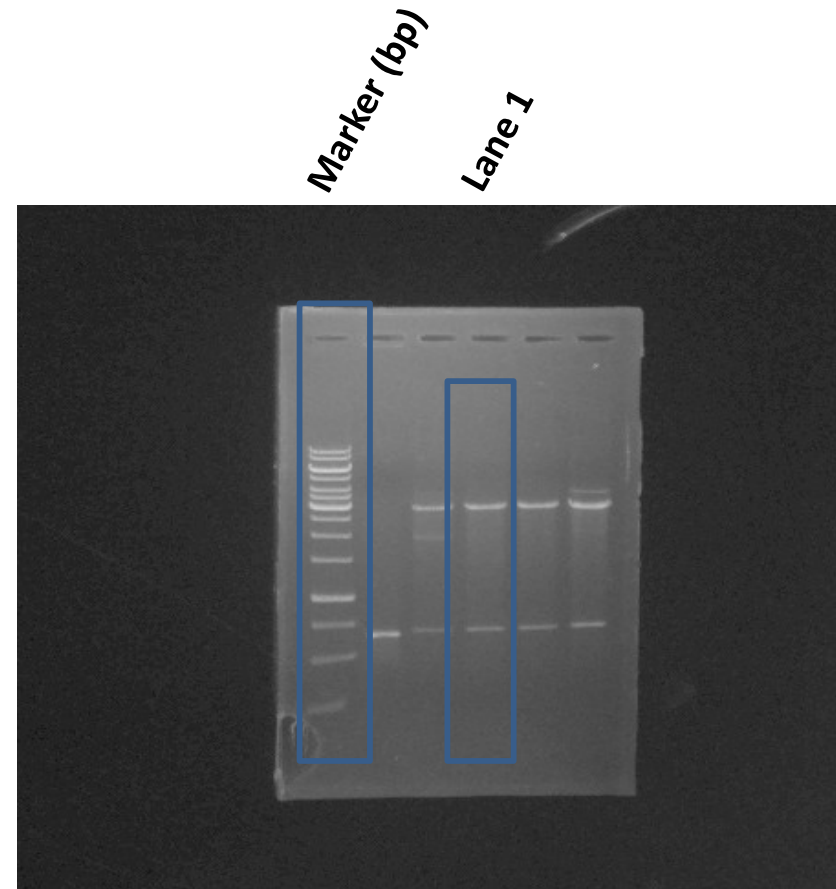

Figure 2-figure supplement 1C\_iii

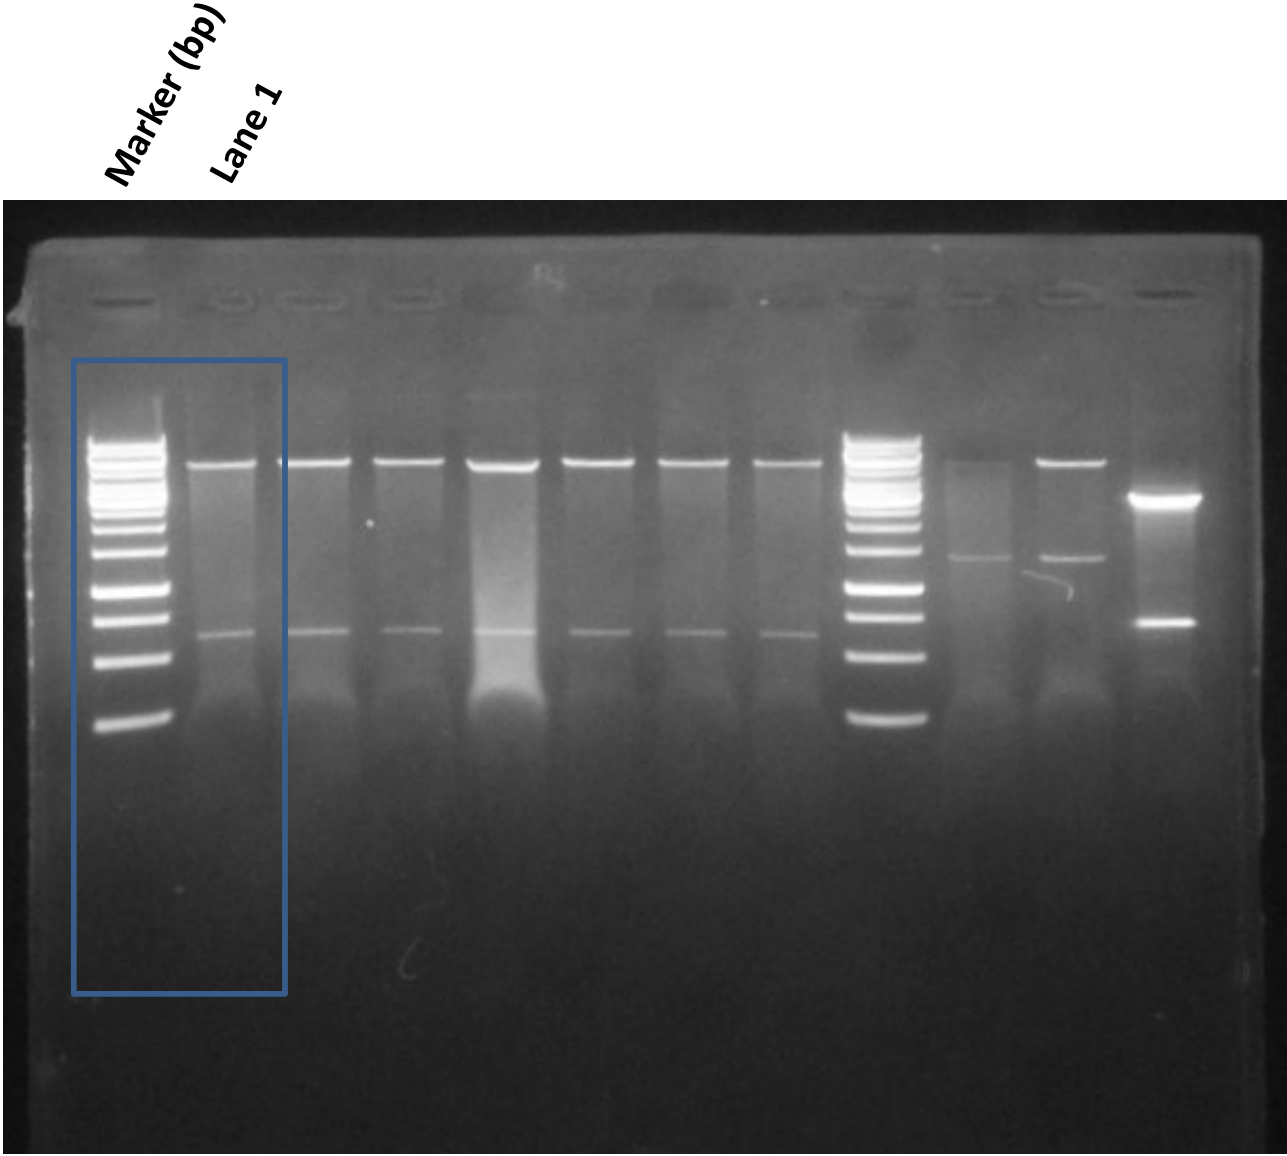

Supplement: fig2-figsupp1-data1 [file PDF of Raw images Figure2-figure supplement 1B & 1C i-iii.pdf › Figure 2-figure supplement 1-Source data 1/PDF of Raw images Figure2-figure supplement 1B & 1C i-iii.pdf]
