# Supplementary figures and images for: LFA-1 interaction with GBP-130 on Plasmodium falciparum-infected red blood cells mediates NK cell activation and parasite control
Source: eLife journal article supplement (doi:10.7554/elife.110942), 2026-05-28

Figure 1B (i)

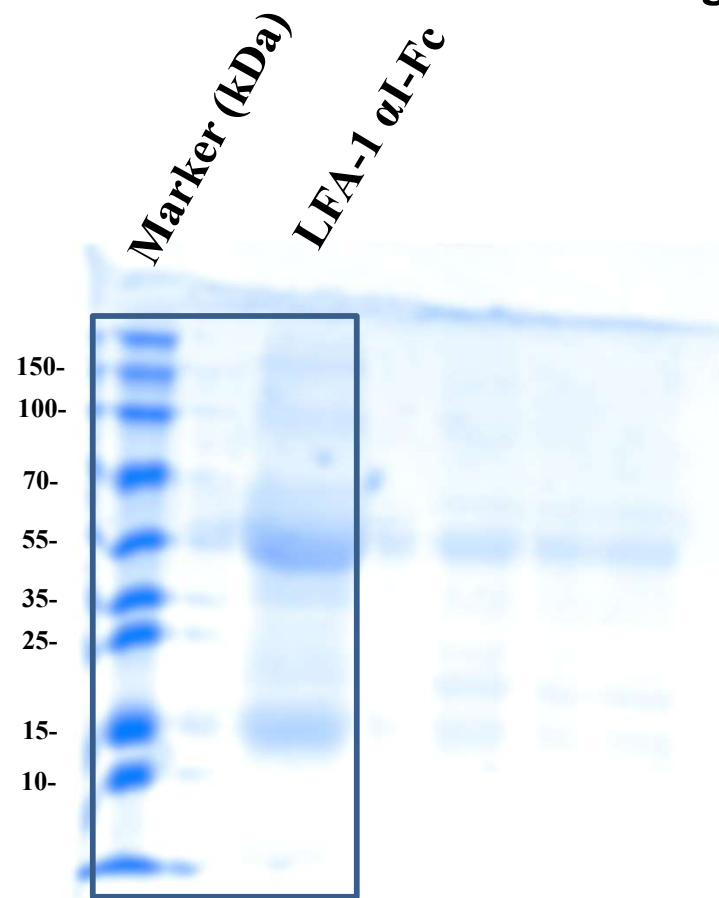

Figure 1B (ii)

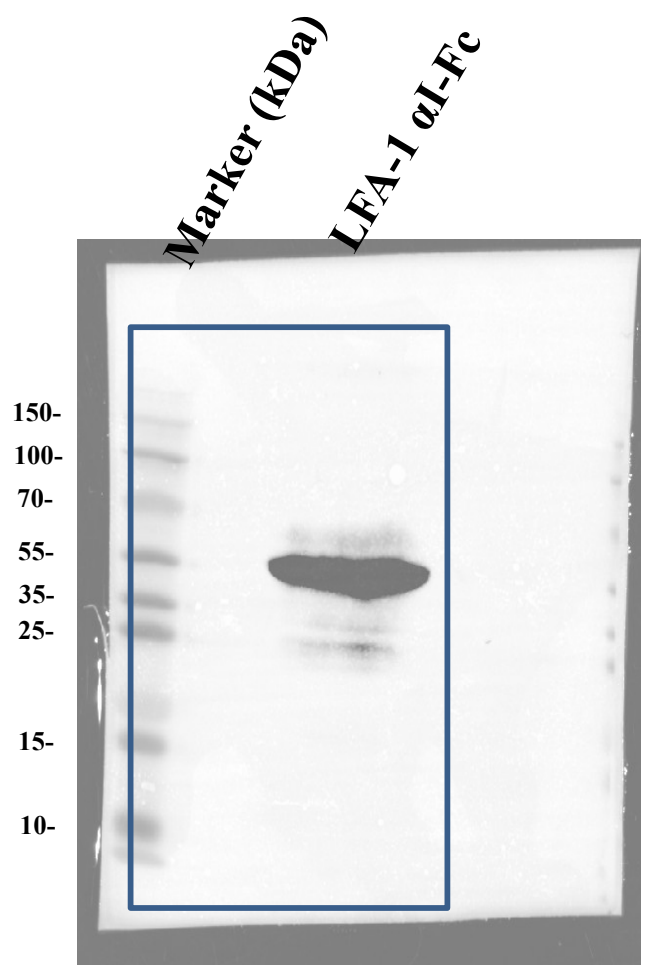

Supplement: fig1-data1 [file PDF of Raw images Figure 1B.pdf › Figure 1-Source data 1/PDF of Raw images Figure 1B.pdf]

Figure 2B (ii)

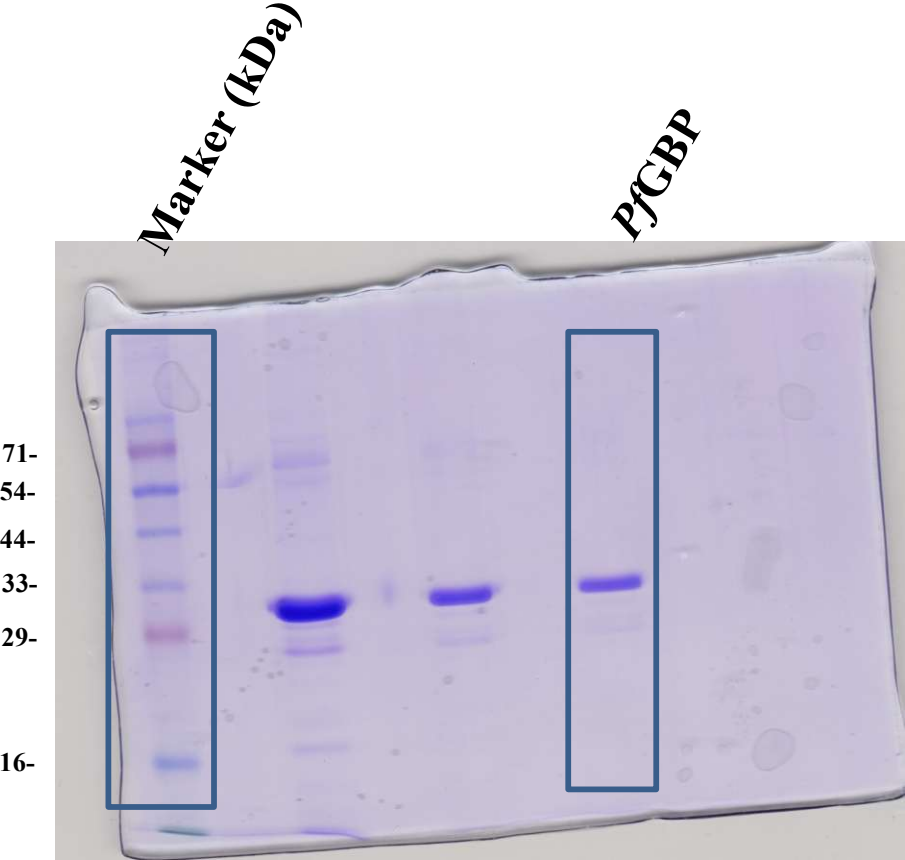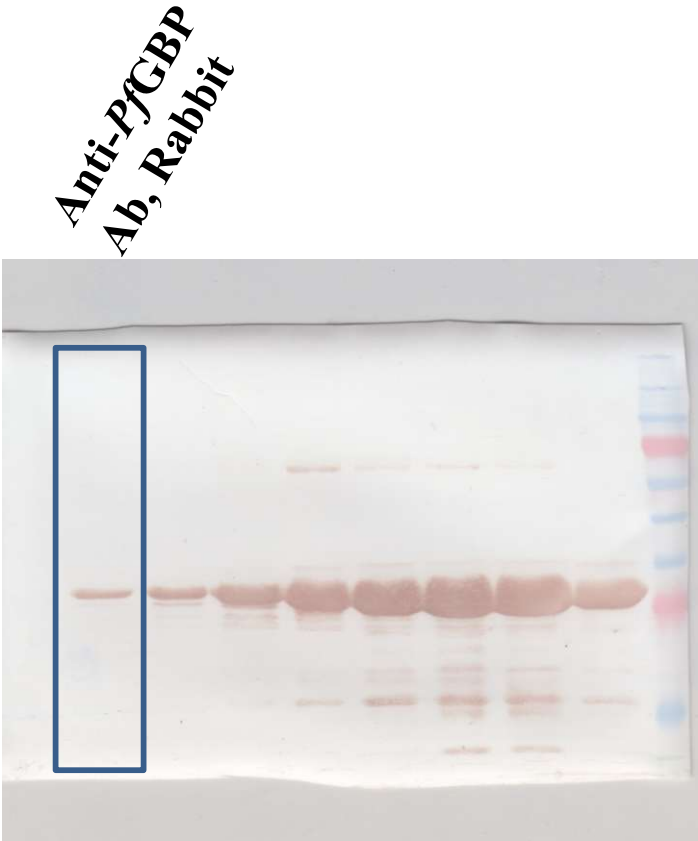

Figure 2B (iv)

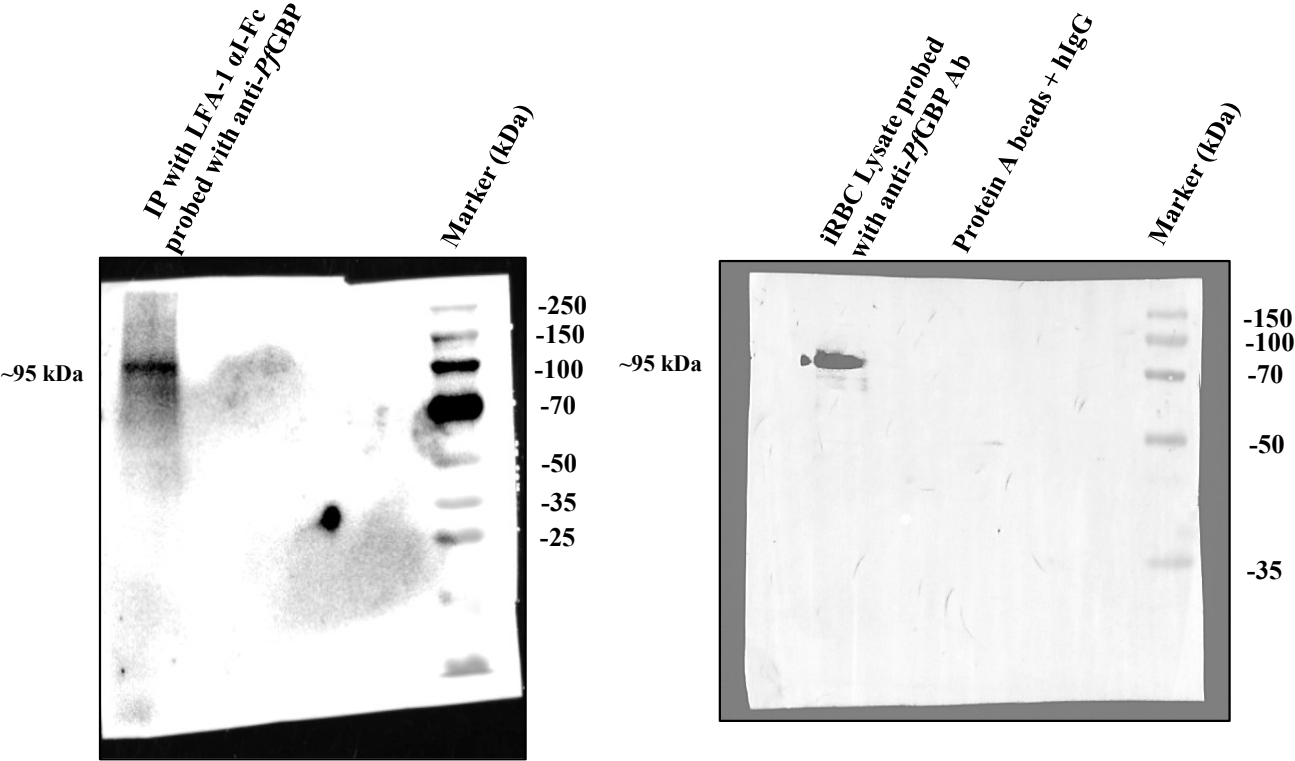

Supplement: fig2-data1 [file PDF of Raw images Figure 2B ii & iV.pdf › Figure 2-Source data 1/PDF of Raw images Figure 2B ii & iV.pdf]

Figure 3B (ii)

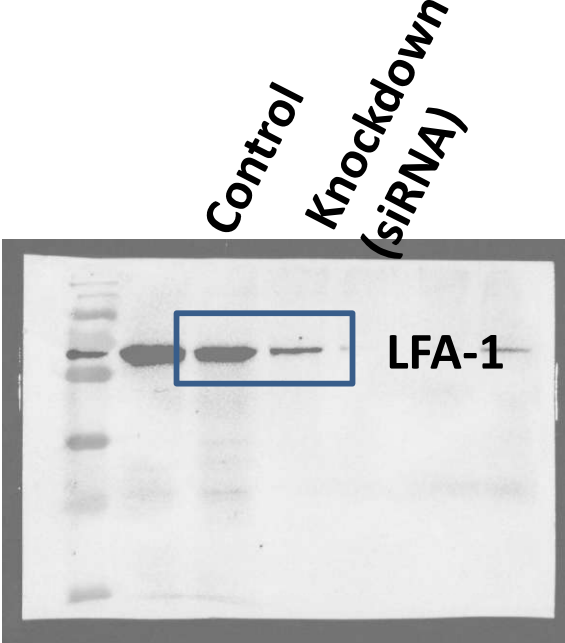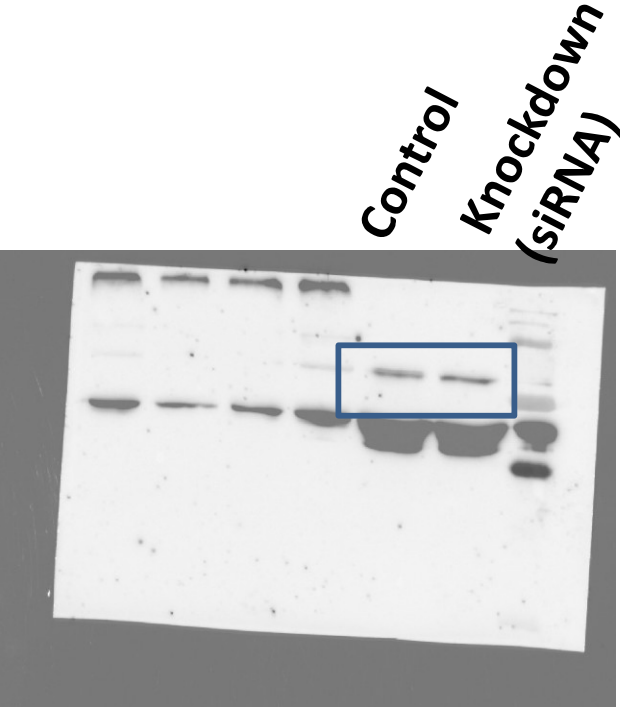

2 loading controls  
were used

$\beta$  Actin  
Anti-H2B

Figure 3C (ii)

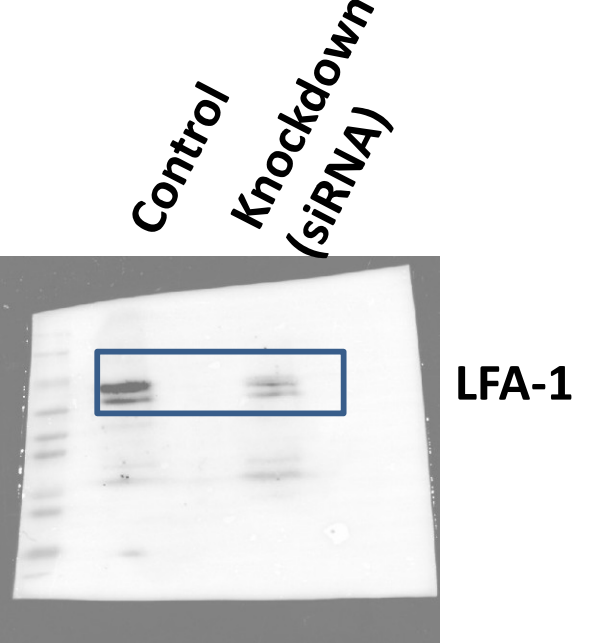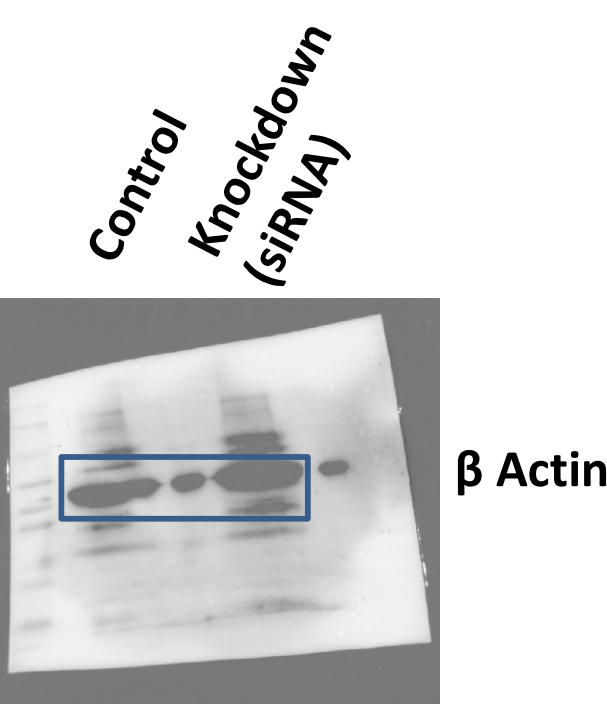

$\beta$  Actin

Supplement: fig3-data1 [file PDF of Raw images Figure 3B & 3C.pdf › Figure 3-Source data 1/PDF of Raw images Figure 3B & 3C.pdf]

Figure 3-figure supplement 1A

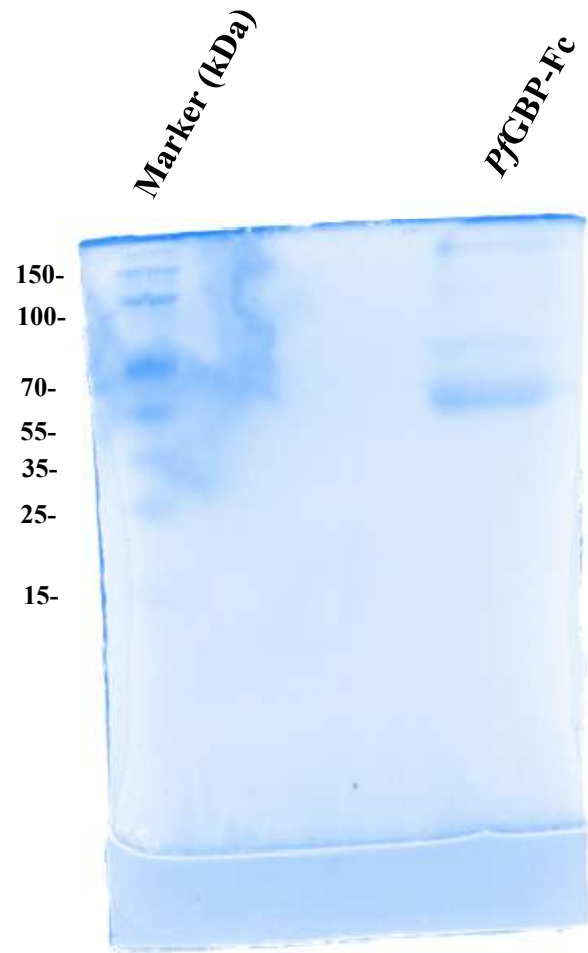

Figure 3-figure supplement 1B

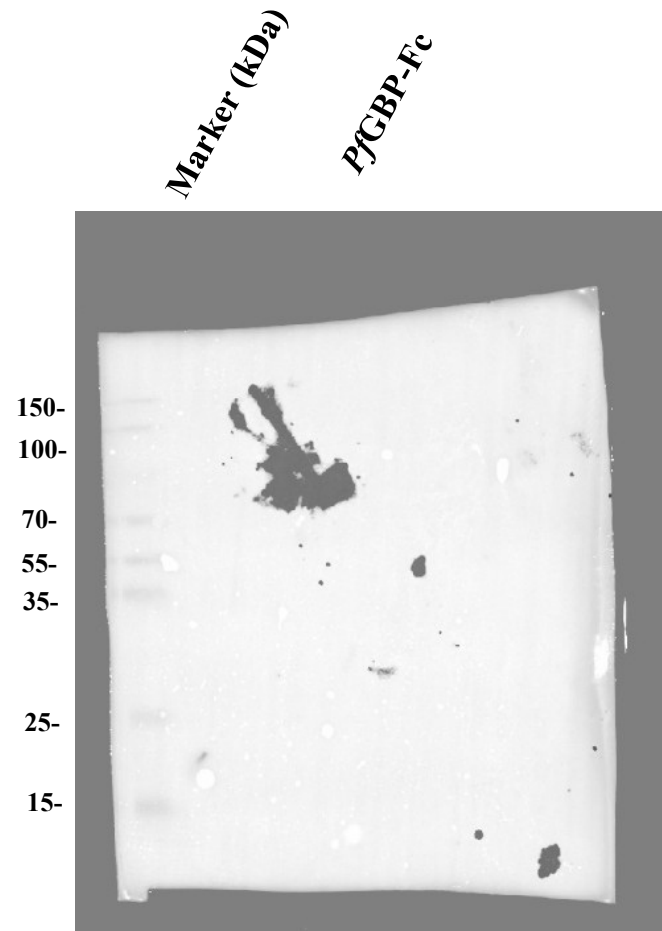

Supplement: fig3-figsupp1-data1 [file PDF of Raw images Figure3-figure supplement 1A & 1B.pdf › Figure 3-figure supplement 1-Source data 1/PDF of Raw images Figure3-figure supplement 1A & 1B.pdf]
